# Supplementary material for: Polyploidy, regular patterning of genome copies, and unusual control of DNA partitioning in the Lyme disease spirochete
Source: PubMed Central journal article supplement (PMC9712426; doi:10.1038/s41467-022-34876-4), 2022-11-22
Supplement: 41467_2022_34876_MOESM1_ESM.pdf [file 41467_2022_34876_MOESM1_ESM.pdf]

1 **Polyploidy, regular patterning of genome copies, and unusual control of DNA partitioning**  
2 **in the Lyme disease spirochete**

3  
4 Constantin N. Takacs, Jenny Wachter, Yingjie Xiang, Zhongqing Ren, Xheni Karaboja, Molly  
5 Scott, Matthew R. Stoner, Irnov Irnov, Nicholas Jannetty, Patricia A. Rosa, Xindan Wang, and  
6 Christine Jacobs-Wagner

7

8 **SUPPLEMENTARY INFORMATION**

|    |                                                                                       |             |
|----|---------------------------------------------------------------------------------------|-------------|
| 9  | <b>Table of contents.....</b>                                                         | <b>Page</b> |
| 10 | Supplementary Notes.....                                                              | 2           |
| 11 | Specific labeling of <i>B. burgdorferi</i> DNA loci using endogenous and heterologous |             |
| 12 | ParB/ <i>parS</i> systems.....                                                        | 2           |
| 13 | Detection of <i>oriC</i> loci in multiple <i>B. burgdorferi</i> strains.....          | 3           |
| 14 | Recapitulation of the mouse-tick transmission cycle using strain CJW_Bb474.....       | 4           |
| 15 | Supplementary Figure Legends.....                                                     | 6           |
| 16 | Supplementary Figures.....                                                            | 16          |
| 17 | Supplementary References.....                                                         | 24          |

18 **SUPPLEMENTARY NOTES**

19 Specific labeling of *B. burgdorferi* DNA loci using endogenous and heterologous ParB/parS  
20 systems

21 ParB proteins specifically recognize their cognate *parS* sequence and spread onto adjacent DNA  
22 sequences<sup>1-3</sup>. Due to this property, expression of a fluorescent protein-tagged ParB protein leads  
23 to accumulation of its fluorescence into a diffraction-limited signal that pinpoints the subcellular  
24 location of the DNA locus that contains the *parS* sequence<sup>4</sup>.

25  
26 We have adapted this method for use in *B. burgdorferi*, whose chromosome contains a single  
27 predicted *parS* sequence<sup>3</sup> located within the *par* locus, 6 kilobases to the left of *oriC*  
28 (Supplementary Fig. 1a). We labeled this *parS* sequence either by replacing the native *parB* gene  
29 (*bb0434*) with the *mcherry-parB* translational fusion, yielding knock-in strains (Fig. 1a,  
30 Supplementary Fig. 1c, Supplementary Data 1), or by driving expression of *mcherry-parB* or  
31 *msfgfp-parB* from a multi-copy shuttle vector (SV) using the weak promoter P<sub>0826</sub><sup>5</sup>  
32 (Supplementary Fig. 1c, Supplementary Data 1). mCherry-ParB fluorescent foci formed only  
33 when *parS* was present on the *B. burgdorferi* chromosome (Supplementary Fig. 1b).

34  
35 To label an additional *B. burgdorferi* locus, we first inserted the *parS* sequence of *E. coli* plasmid  
36 P1<sup>2</sup>, hereafter referred to as *parS*<sup>P1</sup>, into the *B. burgdorferi* genome. We then expressed an *msfgfp*  
37 fusion to the *parB* gene of plasmid P1 (*msfgfp-parB*<sup>P1</sup>) from the same multi-copy shuttle vector  
38 that contained the *mcherry-parB* expression cassette (Supplementary Data 1, Supplementary Fig.  
39 1b). We drove expression of *msfgfp-parB*<sup>P1</sup> using the intermediate strength promoter P<sub>0031</sub><sup>5</sup>. The  
40 expressed msfGFP-ParB<sup>P1</sup> formed fluorescent puncta only when *parS*<sup>P1</sup> was also present in a

41 given *B. burgdorferi* strain (Supplementary Fig. 1b), regardless of whether the chromosomal  
42 *parS* site was present or not (Supplementary Fig. 1b,d), confirming that labeling of the two *parS*  
43 sequences by their tagged cognate ParB proteins was independent and specific.

44

45 This conclusion was further strengthened by quantitative analyses of images of strain  
46 CJW\_Bb205 (Supplementary Fig. 1d-f). In this strain, mCherry-ParB foci, which pinpoint the  
47 subcellular location of *par* loci, and msfGFP-ParB<sup>P1</sup> foci, which pinpoint the subcellular location  
48 of *uvrC* loci (Supplementary Fig. 1a), colocalized almost perfectly (Supplementary Fig. 1d-e).  
49 The *par* and *uvrC* loci are 24 kbp away from each other and 6 and 18 kbp away from *oriC*,  
50 respectively (Supplementary Fig. 1a). Thus, both labels approximate the subcellular location of  
51 *oriC*. Importantly, copy numbers of the *par* and *uvrC* loci were similar (Supplementary Fig. 1f).

52

### 53 Detection of *oriC* loci in multiple *B. burgdorferi* strains

54 We localized the *oriC* locus in several *B. burgdorferi* strains that were derived from the B31  
55 isolate, which is the type strain, as well as from other isolates, namely N40, 297, Sh-2-82, and  
56 JD1. For the B31-derived strains, we used the B31-A3-68- $\Delta bbe02$  genetic background (strains  
57 S9 and K2, see Supplementary Data 1), which is easily transformable and fully capable of  
58 completing the tick-mouse transmission cycle<sup>6,7</sup>. The S9 derivatives CJW\_Bb379 and  
59 CJW\_Bb474 both carry a replacement of the *parB* gene with an *mcherry-parB* fusion driven by  
60 the native *parB* promoter, and are therefore labeled as knock-in (KI) strains (Fig. 1b,  
61 Supplementary Fig.1c). CJW\_Bb474 additionally expresses free GFP, driven by the  $P_{flaB}$   
62 promoter, and inserted into endogenous plasmid cp26 (Fig. 1a, Supplementary Data 1). Strains  
63 CJW\_Bb339 and CJW\_Bb340 are also derived from the infectious K2 and S9 strains,

64 respectively, but express *mcherry-parB* as a second *parB* copy, in trans, from a shuttle vector  
65 (Supplementary Data 1). Strains CJW\_Bb339, CJW\_Bb340, CJW\_Bb379, and CJW\_Bb474  
66 each has an almost complete complement of endogenous plasmids. They only lack plasmids cp9,  
67 lp5, and lp56 (Supplementary Data 1), which are also absent from the parental strains S9 and K2  
68 and are not required for completion of the tick-mouse transmission cycle<sup>6,8-10</sup>. We therefore refer  
69 to these strains as having an infectious background, which we experimentally demonstrated for  
70 strain CJW\_Bb474 (see below).

71

72 We determined that the other B31-derived strains have lost multiple endogenous plasmids  
73 (Supplementary Data 1) during their generation and/or the generation of their parental strains<sup>11-</sup>  
74 <sup>13</sup>. At most, strain CJW\_Bb075 carries 11 endogenous plasmids, while strain CJW\_Bb344 only  
75 carries two endogenous plasmids, cp26 and cp32-3 (Supplementary Data 1). They all expressed  
76 tagged ParB proteins (mCherry-ParB or msfGFP-ParB) from a shuttle vector (Supplementary  
77 Data 1). Lastly, we localized *oriC* loci in several other *B. burgdorferi* strains, including the  
78 widely studied N40, 297, and JD1 isolate backgrounds (Fig. 1b, Supplementary Fig. 1c,  
79 Supplementary Data 1). We did not determine the endogenous plasmid content of the clones  
80 derived from the non-B31 isolates as there are no available characterized sets of primers for  
81 multiplex PCR detection of the native plasmids of these strains.

82

### 83 Recapitulation of the mouse-tick transmission cycle using strain CJW\_Bb474

84 Strain CJW\_Bb474 was used to image the chromosomal copy number in the tick (Fig. 3). Since  
85 this strain carries genetic modifications, it was important to assess whether it can reproduce the  
86 mouse-tick transmission cycle. Two modifications, inactivation of gene *bbe02* and constitutive

87 expression of GFP from cp26, did not affect *B. burgdorferi*'s ability to complete its transmission  
88 cycle when previously tested in several strain backgrounds<sup>6,7,9,10,14,15</sup>. The third modification,  
89 replacement of *parB* with *mcherry-parB*, has not been previously tested. Supplementary Fig. 1i  
90 depicts our experimental setup. Mice were infected with *B. burgdorferi* by needle inoculation  
91 (step a). Naïve tick larvae were allowed to feed on these infected mice and thus to acquire *B.*  
92 *burgdorferi* (step b). These colonized larvae molted into unfed nymphs (step c), which were then  
93 allowed to feed on and transmit *B. burgdorferi* to naïve mice (step d). Infection of mice was  
94 confirmed by tissue biopsy culture in BSK-II medium (stages I and V). *B. burgdorferi*  
95 acquisition by, and stable colonization of, ticks were assessed in fed larvae, unfed nymphs, and  
96 fed nymphs (stages II through IV) by crushing ticks in BSK-II then using the resulting tick  
97 extracts to inoculate liquid BSK-II cultures or embedding them in semisolid BSK-agarose plates.  
98 Spirochete outgrowth in the BSK-II medium or colony formation in the BSK-agarose plates were  
99 deemed evidence that the ticks were colonized by *B. burgdorferi*. All the mice exposed to strain  
100 CJW\_Bb474, as well as those exposed to the CJW\_Bb473 control strain, which only expresses  
101 GFP from cp26, were successfully infected (Supplementary Fig. 1j). All the ticks exposed to  
102 CJW\_Bb474 were also infected, as were most of the ticks exposed to the CJW\_Bb473 control  
103 (Supplementary Fig. 1j). Additionally, spirochete loads in unfed nymphs were close to  $10^2$   
104 cfu/tick for both strains (Supplementary Fig. 1k). These loads increased to above  $10^5$  cfu/tick in  
105 fed nymphs assayed 10 days after completion of nymphal feeding (Supplementary Fig. 1k). The  
106 spirochete burdens that we measured in unfed and fed nymphs are similar to those previously  
107 measured in ticks colonized with the parental strain S9<sup>16-18</sup>. These results indicate that strain  
108 CJW\_Bb474 is fully capable of completing the mouse-tick transmission cycle.

109 **SUPPLEMENTARY FIGURE LEGENDS**

110 **Supplementary Figure 1. *B. burgdorferi* cells carry multiple chromosome copies**

111 **a.** Schematic of chromosomal loci localized in this study (not drawn to scale). *oriC* was localized  
112 either by labeling the *par* locus through the expression of fluorescently tagged ParB (red) or by  
113 insertion of *parS<sup>P1</sup>* downstream of *uvrC*, which is located 52% along the length of the  
114 chromosome, followed by expression of msfGFP-ParB<sup>P1</sup>. The telomeres were labeled by  
115 insertion of *parS<sup>P1</sup>* at the *phoU* or *lptD* loci, which are located at 5% or 98% along the length of  
116 the chromosome, respectively, followed by expression of msfGFP-ParB<sup>P1</sup>. Distances between the  
117 labeled DNA loci and the *oriC* or *terC* loci, are shown in kilobase pairs (kbp).

118 **b.** Images showing that mCherry-ParB and msfGFP-ParB<sup>P1</sup> specifically recognize their cognate  
119 *parS* sites. mCherry-ParB and msfGFP-ParB<sup>P1</sup> were expressed from the same shuttle vector (see  
120 methods). The strains are, from top to bottom: CJW\_Bb211, CJW\_Bb534, CJW\_Bb532, and  
121 CJW\_Bb533. Presence of endogenous *parB* or *parS*, and chromosomal insertion of *parS<sup>P1</sup>* are  
122 indicated at the left.

123 **c.** Localization of mCherry-ParB or msfGFP-ParB at *oriC* regions in various strain backgrounds.  
124 Tagged ParB was expressed either by knock-in of *mcherry-parB* at the gene locus or in trans,  
125 from a shuttle vector. Strain CJW\_Bb142 expressed *msfgfp-parB* from a shuttle vector. Strain  
126 backgrounds are shown at the left. The CJW\_Bb number of each strain is listed on the phase-  
127 contrast image.

128 **d.** Images of a cell of strain CJW\_Bb205 showing the *oriC* region co-labeled by expression of  
129 mCherry-ParB, which binds to the endogenous *parS* site located within the *par* locus, and  
130 msfGFP-ParB<sup>P1</sup>, which binds to the *parS<sup>P1</sup>* sequence introduced at the *oriC*-proximal *uvrC* locus,  
131 as shown in (a).

132 **e.** Fluorescence intensity profiles along the cell length for the cell shown in (d).

133 **f.** Boxplot showing the number of *oriC* copies per cell based on the labeling of the *par* locus  
134 (red) or of the *uvrC* locus (blue) in strain CJW\_Bb205. Shown are the mean of the data (middle  
135 line), the 25 to 75 percentiles of the data (box), and the 2.5 to 97.5 percentiles of the data  
136 (whiskers).

137 **g.** Images showing DNA fluorescence in situ hybridization (FISH) staining of the repetitive  
138 sequence found within the right telomere of the chromosome of strain 297. Strain B31e2, which  
139 does not contain this repetitive sequence, serves as a negative control. Cell outlines are in green.

140 **h.** qPCR-based quantification of chromosomal copy numbers per cell in strain CJW\_Bb339 at  
141 different culture densities. *flaB* and *recA* gene copy numbers per cell (mean  $\pm$  standard  
142 deviations of measurements done in three replicate cultures) are shown in blue and red,  
143 respectively. Culture densities (mean  $\pm$  standard deviation) are in black. Values do not account  
144 for losses that may have occurred during sample prep.

145 **i.** Schematic of the experimental workflow used to test the transmission of *B. burgdorferi* strains  
146 CJW\_Bb473 and CJW\_Bb474 between ticks and mice. Roman numerals depict the stages at  
147 which infection of mice or colonization of ticks by *B. burgdorferi* was assessed.

148 **j.** Summary of infection or colonization readouts as assayed at the stages depicted in (i). Assay  
149 methods are given for each stage. Shown are numbers of positive animals (mice or ticks) over  
150 numbers of assayed animals.

151 **k.** Plot showing *B. burgdorferi* loads in nymphs prior to nymphal stage feeding (unfed) or 10  
152 days after nymphal feeding drop-off (fed). Individual data points, as well as the mean values  $\pm$   
153 standard deviation, are plotted. For unfed nymphs colonized with strain CJW\_Bb473, one of the

154 nymphs contained no spirochetes (see Source Data). This data point could not be plotted on a log  
155 scale but is included in the calculation of the mean.

156 Source data for panels f, h, and k are provided as a Source Data file. The numbers (*n*) of cells  
157 analyzed and the number of replicates are provided in Supplementary Data 2.

158

159 **Supplementary Figure 2. *B. burgdorferi* contains multiple copies of its endogenous plasmids**

160 **a.** Boxplots showing the quantification of various characteristics (plasmid copies per cell;  
161 plasmid copies per 10  $\mu\text{m}$  of cell length; plasmid to *oriC* ratios; *oriC* copies per cell; *oriC* copies  
162 per 10  $\mu\text{m}$  of cell length, and cell length) for strains in which an endogenous plasmid is labeled  
163 by insertion of *parS<sup>P1</sup>* and expression of msfGFP-ParB<sup>P1</sup>, while *oriC* is labeled by expression of  
164 mCherry-ParB. Strains are, from left to right: CJW\_Bb207, CJW\_Bb526, CJW\_Bb274,  
165 CJW\_Bb489, CJW\_Bb271, CJW\_Bb241, CJW\_Bb325, CJW\_Bb272, CJW\_Bb261,  
166 CJW\_Bb326, CJW\_Bb203, CJW\_Bb501, CJW\_Bb515, CJW\_Bb517, CJW\_Bb516, and  
167 CJW\_Bb518. Selected images for each of these strains are provided in Fig. 2a. Shown are the  
168 mean of the data (middle line), the 25 to 75 percentiles of the data (box), and the 2.5 to 97.5  
169 percentiles of the data (whiskers).

170 **b.** An exponentially growing culture of strain CJW\_Bb203, in which *oriC* is labeled by  
171 expression of mCherry-ParB and cp26 is labeled using the msfGFP-ParB<sup>P1</sup>/*parS<sup>P1</sup>* system, was  
172 diluted to  $10^3$  cells/mL, then imaged daily from day 4 through day 8 of growth in culture. Shown  
173 is the *oriC* copy number per cell (red, mean  $\pm$  standard deviation), the cp26 copy number per cell  
174 (blue, mean  $\pm$  standard deviation) and the culture density (black, in cells/mL) at the indicated  
175 times.



176 Source data are provided as a Source Data file. The numbers ( $n$ ) of cells analyzed and the  
177 number of replicates are provided in Supplementary Data 2.

178

179 **Supplementary Figure 3. Chromosome and plasmid copy numbers correlate with cell**  
180 **length**

181 **a.** Correlations between *oriC* copy number per cell and cell length in the indicated strains, which  
182 are also shown and analyzed in Fig. 1b and Supplementary Fig. 1c.  $r$ , Spearman's correlation  
183 coefficient.

184 **b.** Same as in (a), except for strains CJW\_Bb074 and CJW\_Bb142. These strains have longer  
185 characteristic cell lengths, which is reflected in the range used for the x-axis.

186 **c.** Correlations between plasmid copy number per cell and cell length in a subset of the strains  
187 described in Supplementary Fig. 2a and Fig. 2a. The analyzed plasmid is listed in blue, while the  
188 Spearman's correlation coefficient  $r$  is in burgundy.

189 **d.** Correlations between plasmid copy number per cell and cell length in the remaining strains  
190 described in Supplementary Fig. 2a and Fig. 2a and not included in (c). These plasmids have  
191 fewer copies per cell. The analyzed plasmid is listed in blue, while the Spearman's correlation  
192 coefficient  $r$  is in burgundy.

193 Source data are provided as a Source Data file. The numbers ( $n$ ) of cells analyzed and the  
194 number of replicates are provided in Supplementary Data 2.

195 **Supplementary Figure 4. ParZ is a novel centromere-binding protein that controls oriC**  
196 **segregation**

197 **a.** Whole genome ChIP-seq profiles for strains expressing free GFP (CJW\_Bb473), ParZ-  
198 msfGFP (CJW\_Bb378), mCherry-ParB (CJW\_Bb379), or ParA-msfGFP (CJW\_Bb488). The x-  
199 axis shows the chromosome coordinates followed by the concatenated endogenous plasmids of  
200 strain S9 in the order: lp28\_3, lp25, lp28\_2, lp38, lp36, lp28\_4, lp54, cp26, lp17, lp28\_1,  
201 cp32\_1, cp32\_3, cp32\_4, cp32\_6, cp32\_7, cp32\_8, cp32\_9, and lp21. The vertical dotted lines  
202 indicate the boundary between chromosomal and plasmid sequences in the concatenated genome.  
203 Two replicates are shown for each strain. No ChIP-seq peaks are seen in the free GFP control.  
204 The peaks visible in the other traces correspond to the *par* locus (also see Fig. 6). The  
205 endogenous *P<sub>flaB</sub>* and *flaBt* sequences were computationally removed from the *flaB* locus on the  
206 chromosome sequence before read mapping to prevent erroneous mapping of ChIP-seq reads to  
207 the *flaB* locus (see the Online Methods for a detailed explanation).

208 **b.** ChIP-seq profiles of ParZ-msfGFP and mCherry-ParB binding to the *par* locus in strain  
209 CJW\_Bb403, which expresses both protein fusions.

210 **c.** ChIP-seq profile of ParZ-msfGFP binding to the genome of strain CJW\_Bb101, which carries  
211 *parZ-msfgfp* on a shuttle vector. The two peaks of binding are at the chromosomal *par* locus and  
212 on the shuttle vector, as indicated. See panels (d) and (e) for detailed views of binding to these  
213 genome regions. Strain CJW\_Bb101 lacks all endogenous plasmids except lp54, cp26, lp17,  
214 cp32-1, cp32-3, and cp32-4. The sequences corresponding to these plasmids were concatenated  
215 in this order, followed by the sequence of the pBSV2G\_P<sub>0826</sub>-RBS-ParZ-msfGFP<sup>Bb</sup> shuttle vector  
216 to generate the plasmid portion of the genome of strain CJW\_Bb101. The vertical dotted line  
217 indicates the boundary between chromosomal and plasmid sequences in the concatenated

218 genome. The endogenous  $P_{0826}$  and  $P_{flgB}$  sequences were removed from the chromosome before  
219 the mapping of the reads to prevent erroneous mapping of ChIP-seq reads to these chromosomal  
220 loci (see the Online Methods for a detailed explanation).

221 **d.** Detailed view of panel (c) showing the binding of ParZ-msfGFP to the chromosomal *par*  
222 locus.

223 **e.** Detailed view of panel (c) showing the binding of ParZ-msfGFP to sequences within the  
224 shuttle vector.

225 **f.** Images of a cell of strain CJW\_Bb101. Arrowheads pinpoint four of the many densely packed  
226 ParZ-msfGFP puncta that can be detected in cells of this strain.

227 **g.** Images of a cell of a strain CJW\_Bb571 which expresses ParZ-msfGFP from the *parZ* gene  
228 locus and carries an empty shuttle vector.

229 **h.** ChIP-seq profiles showing an overlay of the landscape binding pattern of free GFP, ParZ-  
230 msfGFP, mCherry-ParB, and ParA-msfGFP to the concatenated endogenous plasmid sequences.  
231 Traces are those of Replicate 2 shown in (a).

232

### 233 **Supplementary Figure 5. Phylogenetic analyses of Par proteins**

234 **a.** Alignment of the indicated chromosomally expressed ParB sequences. ParB domains are  
235 highlighted at the bottom.

236 **b.** Alignment of indicated chromosomally expressed ParA sequences. The numbers at the right  
237 indicate the same species as those listed in (a), at the right.

238 **c.** Table showing the distance in base pairs (bp) between *parA* and *parB* homologs in the *par*  
239 loci of representative spirochete bacteria. *parA* and *parB* are found in the same orientation with a

240 short genomic distance separating the two genes, which is suggestive of an operon structure. A  
241 negative value indicates overlap of the coding regions of the two genes.

242 **d.** Organization of the *par* loci of the indicated Lyme disease spirochete strains as visualized  
243 using the BorreliaBase genome browser<sup>19</sup>.

244 **e.** Alignment of 65 Borreliaceae ParZ sequences. Putative ParZ domains are highlighted at the  
245 bottom. Sequences belonging to Lyme disease and relapsing fever spirochetes are marked at the  
246 right.

247

248 **Supplementary Figure 6. Characterization of *B. burgdorferi* strains expressing tagged Par**  
249 **proteins and/or carrying *par* gene mutations.**

250 **a.** ParA-msfGFP signal concentrations in individual cells of strains carrying *parA-msfGFP* as the  
251 single *parA* copy at its native locus (knock-in strains). *par* locus mutations present in these  
252 strains are indicated at the bottom. From left to right, the strains are: CJW\_Bb488, CJW\_Bb520,  
253 CJW\_Bb519, CJW\_Bb610. Shown are individual data points as well as means  $\pm$  standard  
254 deviations. A.U., arbitrary units.

255 **b.** Same as in (a), but also including strains carrying *parA-msfGFP* on a shuttle vector. From left to  
256 right, the strains are: CJW\_Bb488, CJW\_Bb520, CJW\_Bb519, CJW\_Bb610, CJW\_Bb219,  
257 CJW\_Bb218, CJW\_Bb256, and CJW\_Bb255. Please note the y-axis range is different than in  
258 (a).

259 **c.** Phase contrast and fluorescence micrographs of strains expressing ParA-msfGFP from a  
260 shuttle vector and carrying the indicated *par* locus mutations. From top to bottom, the strains are:  
261 CJW\_Bb219, CJW\_Bb218, CJW\_Bb256, and CJW\_Bb255.

262 **d.** Plot showing relative mRNA levels for *parZ* and *parZ* $\Delta$ *N20* determined by qRT-PCR in the  
263 indicated strains. Shown are the individual values and the means from two replicates. Mann-  
264 Whitney test comparing *parZ* $\Delta$ *N20* expression (strain CJW\_Bb610) with *parZ* expression (strain  
265 CJW\_Bb488) yielded  $p = 0.33$ .

266 **e.** Plots comparing cell length, *oriC* copy numbers per cell, *oriC* copies per 10  $\mu$ m of cell length,  
267 and abundance of cells without *oriC* foci for control and mutant strains analyzed in Figs. 6, 8,  
268 and 9. The boxplots depict the mean of the data (middle line), the 25 to 75 percentiles of the data  
269 (box), and the 2.5 to 97.5 percentiles of the data (whiskers). The numbers on the bottom graph  
270 represent the number of cells without *oriC* foci and the total number of cells analyzed for each  
271 strain. The nature of the *oriC* label is listed at the top. Mutations introduced into the strains are  
272 listed at the bottom. From the left, the following strains were used: CJW\_Bb378, CJW\_Bb490,  
273 CJW\_Bb524, CJW\_Bb616, CJW\_Bb603, CJW\_Bb602, CJW\_Bb379, CJW\_Bb525,  
274 CJW\_Bb626, and CJW\_Bb604.

275 **f.** Phase contrast and fluorescent images of a cell of strain CJW\_Bb626 that expresses mCherry-  
276 ParB and carries the  $\Delta$ *parZ* mutation.

277 **g.** Plot showing the growth kinetics of the indicated strains in semisolid BSK-agarose media.  
278 Approximately 50 cells of each strain were plated in triplicate. The plates were then inspected  
279 daily from day 5 after plating onwards and visible colonies were counted on each day. The  
280 plating efficiency measured on a given day was calculated by dividing the number of colonies  
281 counted on that day by the maximum number of colonies counted on the same plate during the 9-  
282 day course of the experiment. Shown are means  $\pm$  standard deviations.

283 **h.** Growth curves of the indicated strains in BSK-II medium. Cultures were inoculated in  
284 triplicate from exponentially growing parental cultures and then cell densities were determined  
285 daily by direct counting under darkfield illumination. Shown are means  $\pm$  standard deviations.  
286 Source data for panels a,b,d,e,g, and h are provided as a Source Data file. The numbers (*n*) of  
287 cells analyzed and the number of replicates are provided in Supplementary Data 2.

288

289 **Supplementary Figure 7. ParZ-like sequences can be found in Firmicutes, Fusobacteria,**  
290 **and their phages**

291 Blast searches were performed using *B. burgdorferi* ParZ as bait. No hits were obtained among  
292 archaeal and eukaryotic proteins. Hits obtained among bacterial chromosome-encoded proteins  
293 are in red, while those obtained among bacteriophage-encoded proteins are in cyan. Letters  
294 highlight the Firmicutes and Fusobacteria phyla, or the Borreliaceae family, while the numbers  
295 highlight the indicated genera.

296

297 **Supplementary Figure 8. Schematic pedigree of genetic changes engineered at the *par* and**  
298 ***smc* loci**

299 **a.** Depiction of genetic changes at the *par* locus. Genes affected by genetic modifications are in  
300 orange. Genes flanking the modified region and not affected by the changes are in gray. WT,  
301 wild type. *aacCI*, gentamicin resistance cassette. *aphI*, kanamycin resistance cassette. The  
302 promoters and transcriptional terminators present in the antibiotic resistance cassettes are not  
303 shown. Features are not drawn to scale. The lines starting from the WT locus at the left depict the  
304 order in which successive genetic modifications were introduced. \*, *parZ* $\Delta$ N20.

305 **b.** Same as in (a) but for the *smc* locus. *hyp*, gene *bb0044* of hypothetical function. \*, a short  
306 sequence encoding the C-terminus of SMC was not deleted to avoid inactivating the promoter  
307 upstream of gene *bb0044*.

308 a. and b. Please note that individual strains (see Supplementary Data 1) may carry genetic  
309 modification at a single locus or multiple loci, including the chromosomal *phoU*, *uvrC*, or *lptD*  
310 loci, or plasmid-specific loci.

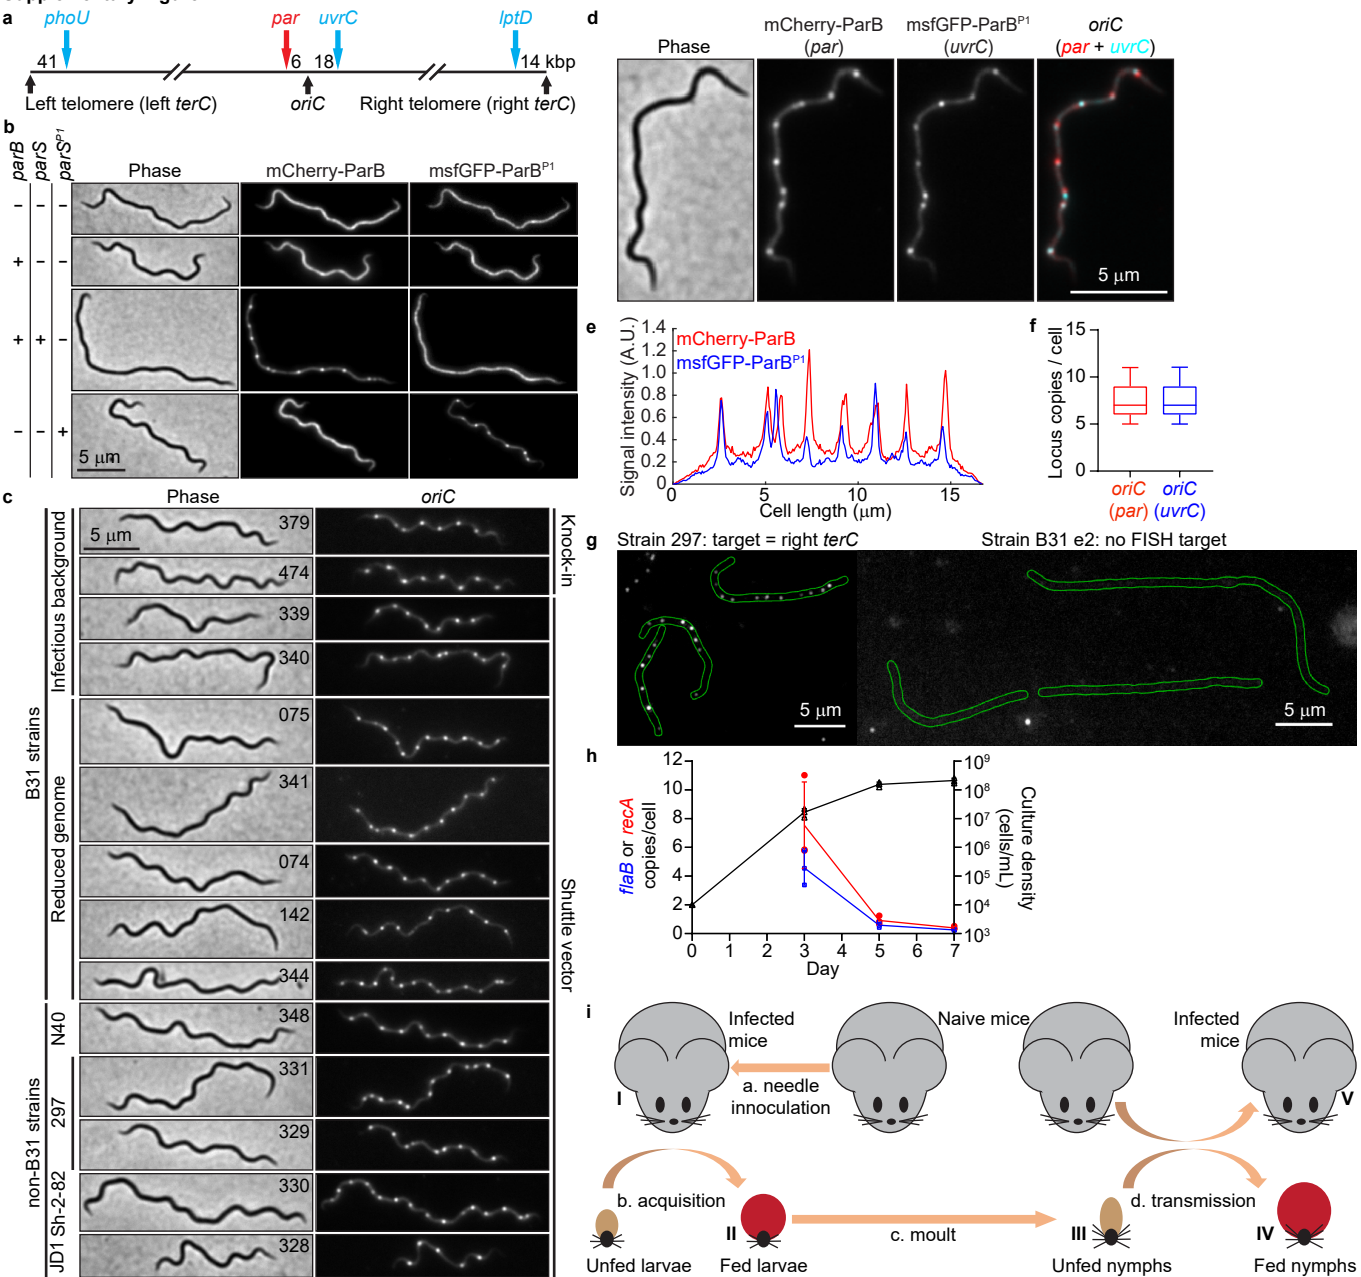

**j**

| Strain    | Genetic Features                 | Stage (Method) |                      |                       |                      |             |
|-----------|----------------------------------|----------------|----------------------|-----------------------|----------------------|-------------|
|           |                                  | I (Culture)    | II (Culture/Plating) | III (Culture/Plating) | IV (Culture/Plating) | V (Culture) |
| CJW_Bb473 | <i>gfp</i>                       | 5/5            | 5/9                  | 5/6                   | 6/6                  | 2/2         |
| CJW_Bb474 | <i>gfp</i> ; <i>mCherry-parB</i> | 5/5            | 9/9                  | 6/6                   | 6/6                  | 2/2         |

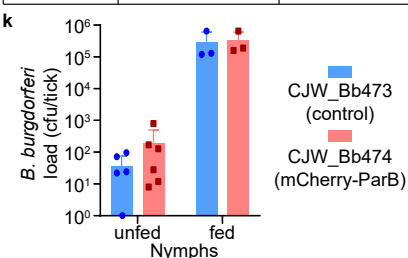



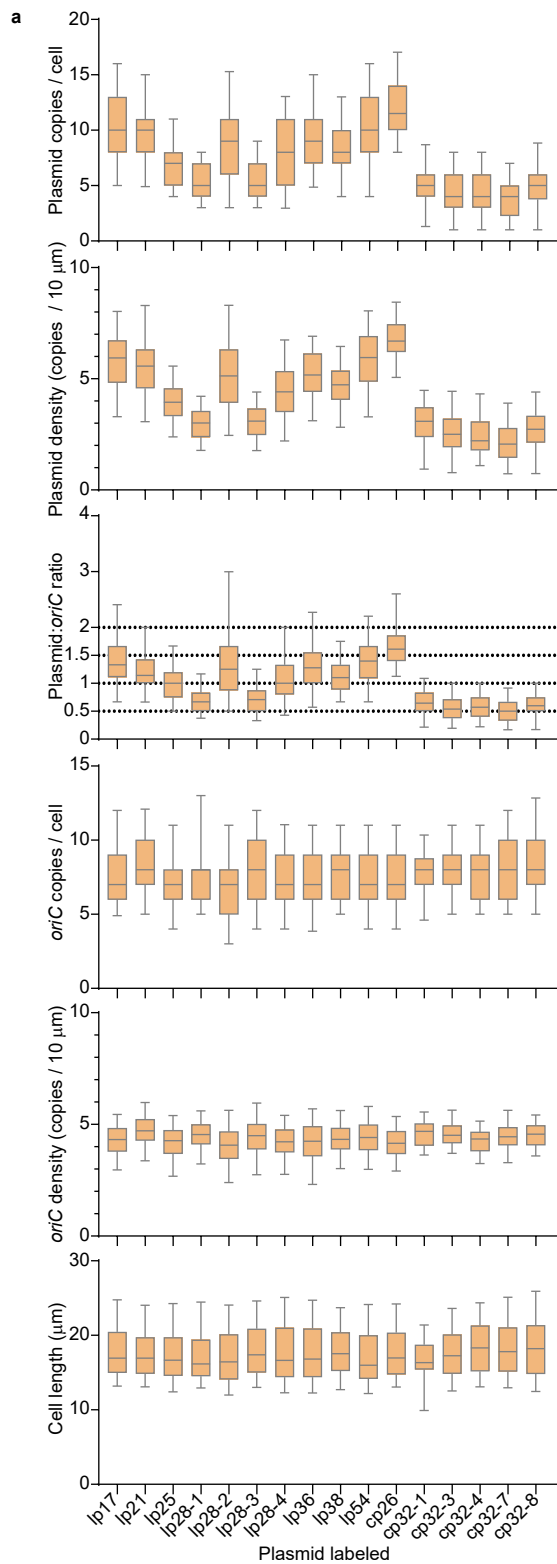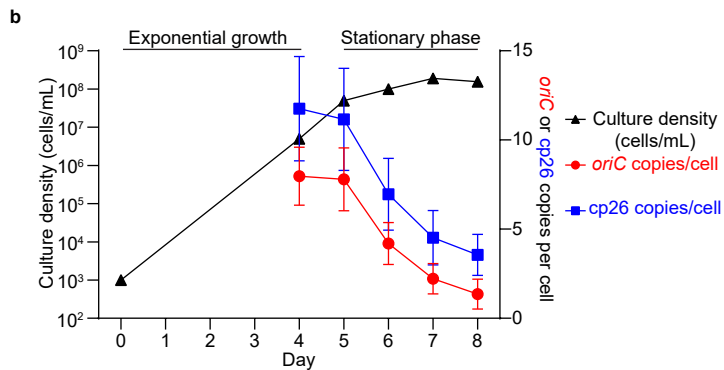

Supplementary Figure 3

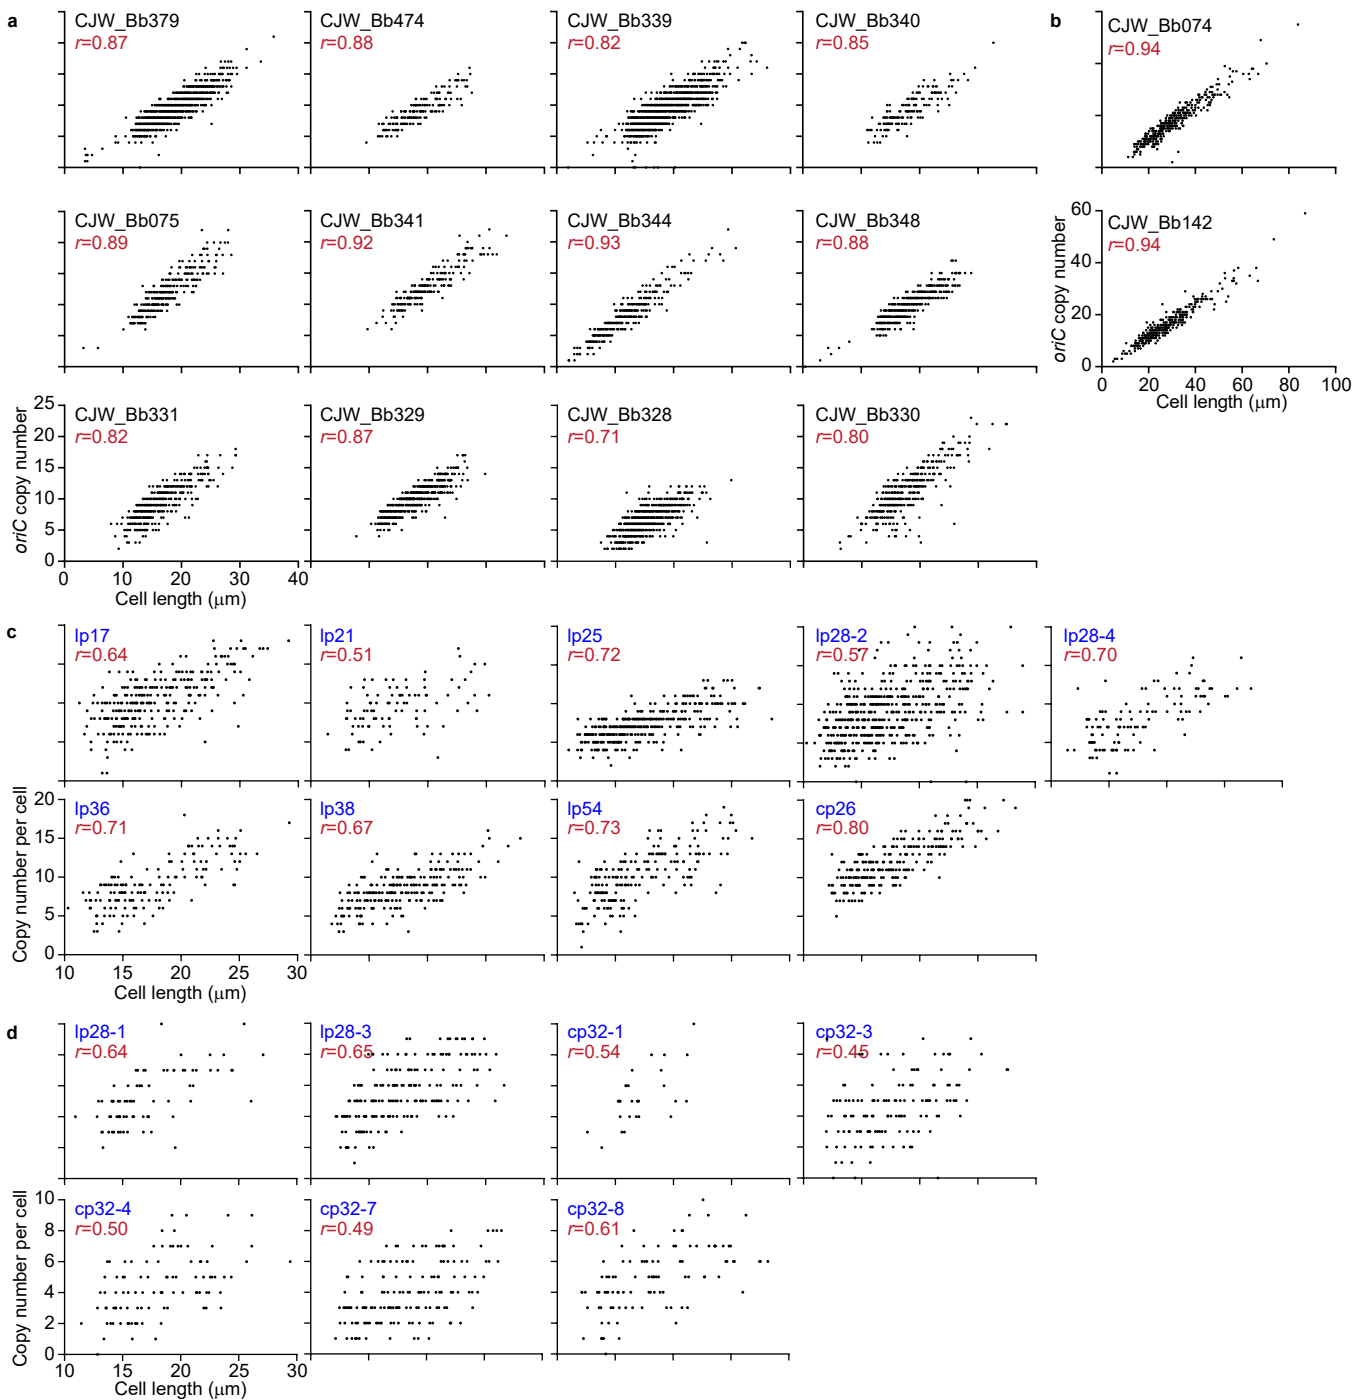

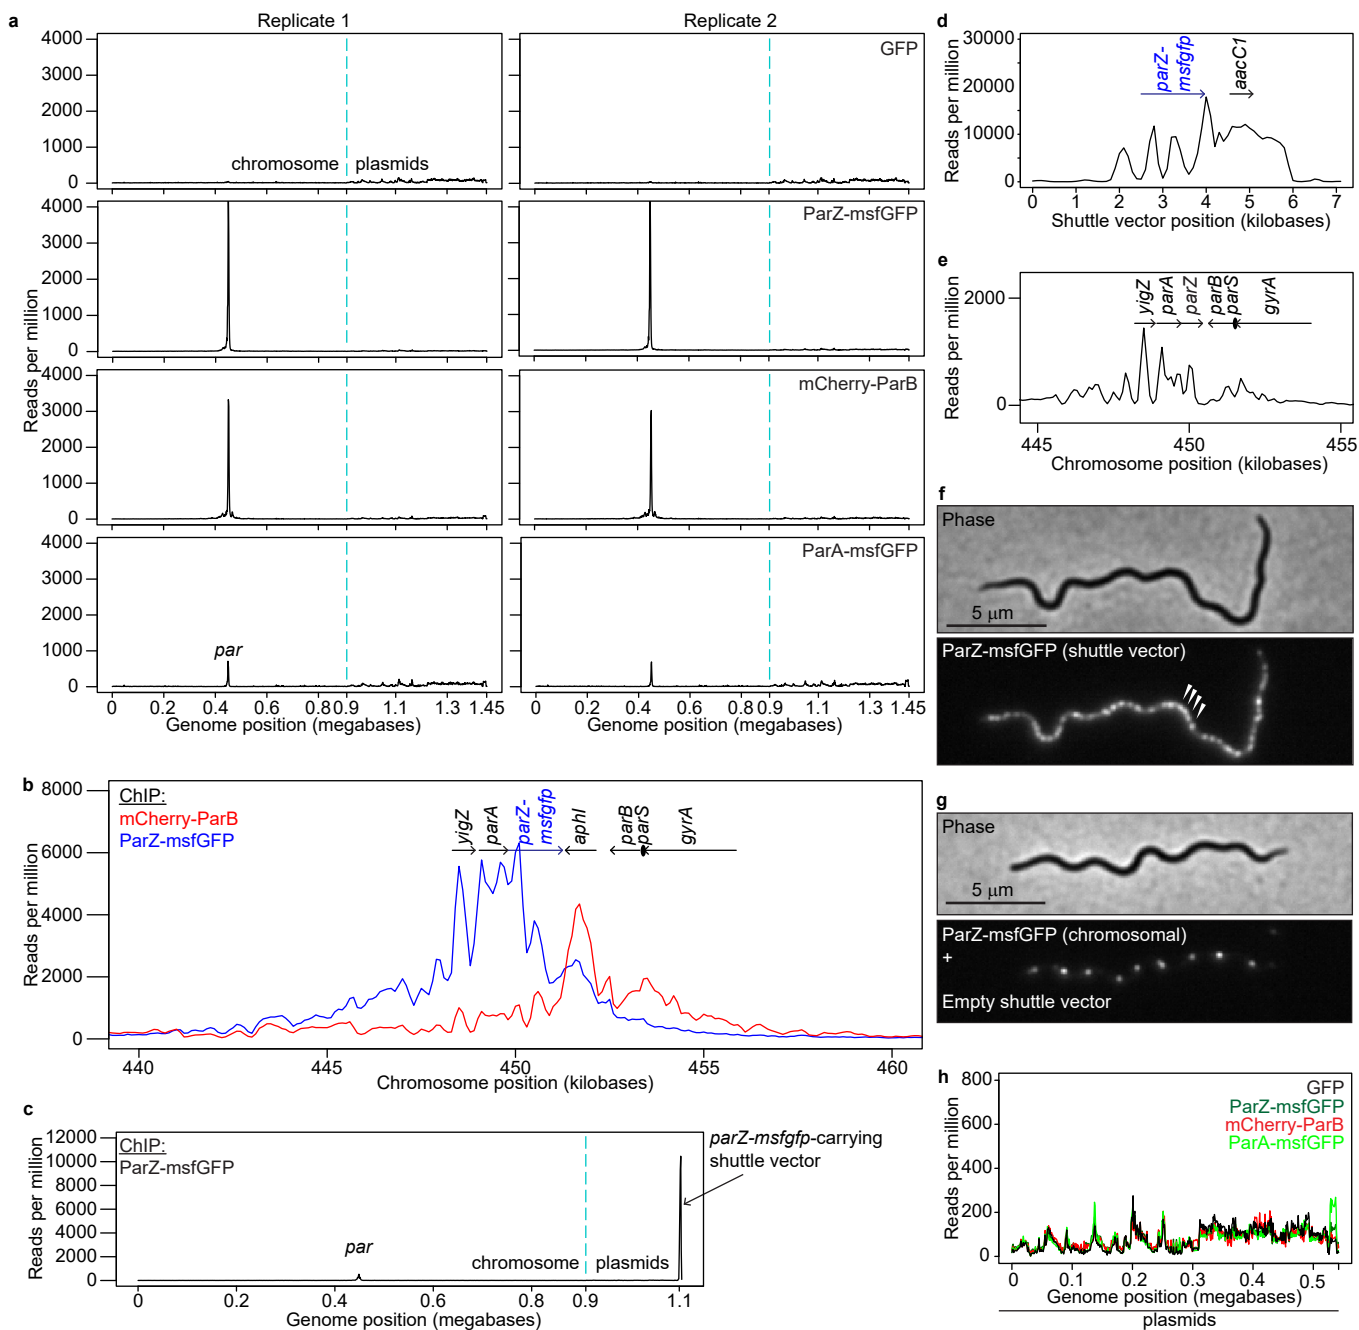

Supplementary Figure 5

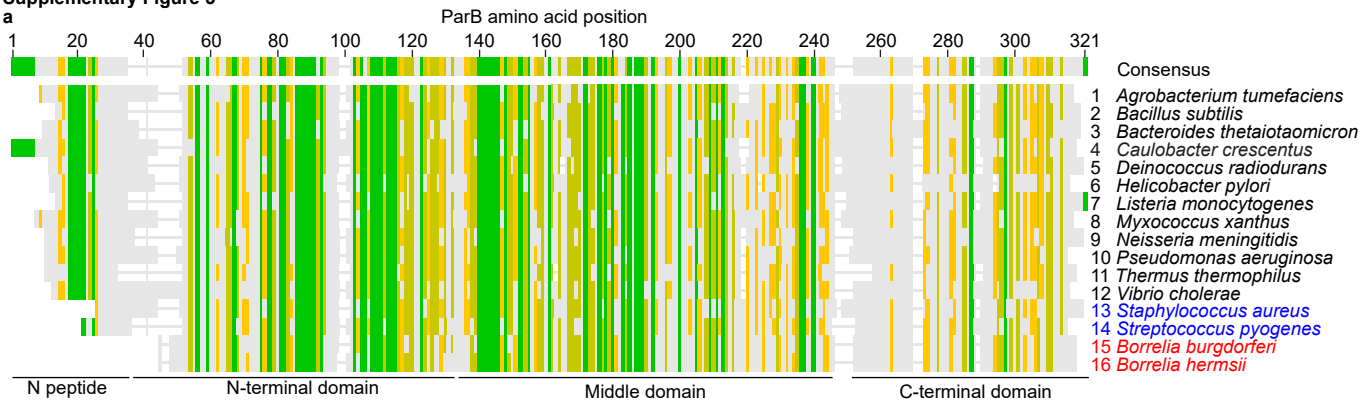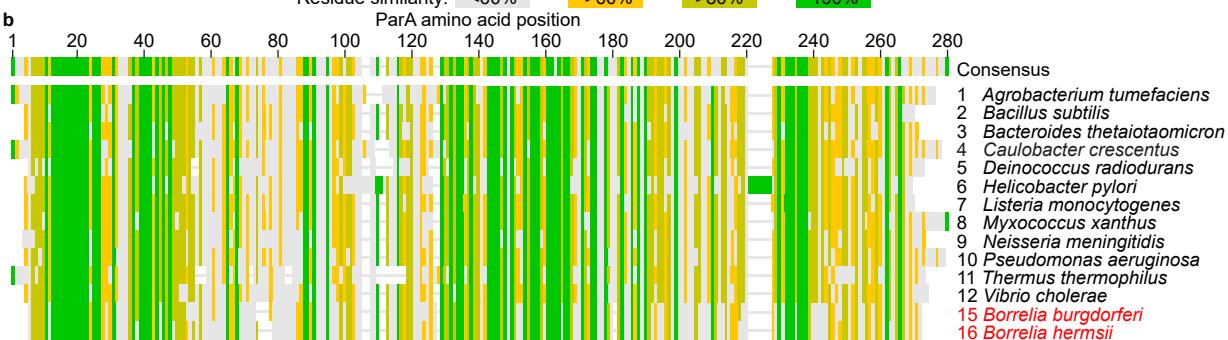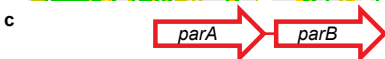

**d**

| Species (strain)                                                 | <i>parA-parB</i> distance (bp) |
|------------------------------------------------------------------|--------------------------------|
| <i>Brachyspira hyodysenteriae</i> (WA1)                          | 100                            |
| <i>Leptospira interrogans</i> ser. <i>Copenhageni</i> (Piyasena) | 3                              |
| <i>Leptospira biflexa</i> ser. <i>Patoc</i> (Patoc 1)            | 4                              |
| <i>Treponema denticola</i> (ATCC 35405)                          | -7                             |
| <i>Treponema pallidum</i> subsp. <i>pallidum</i> (Nichols)       | -13                            |
| <i>Spirochaeta africana</i> (DSM 8902)                           | -22                            |
| <i>Sphaerochaeta globosa</i> (Buddy)                             | -19                            |
| <i>Salinispira pacifica</i> (L21-Rpul-D2)                        | 32                             |

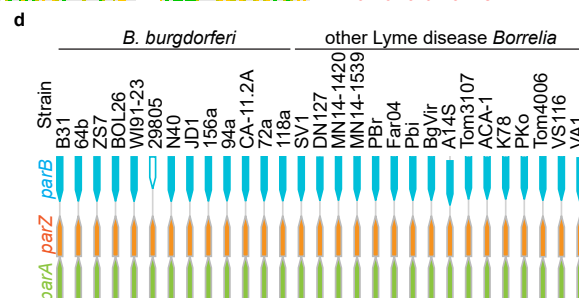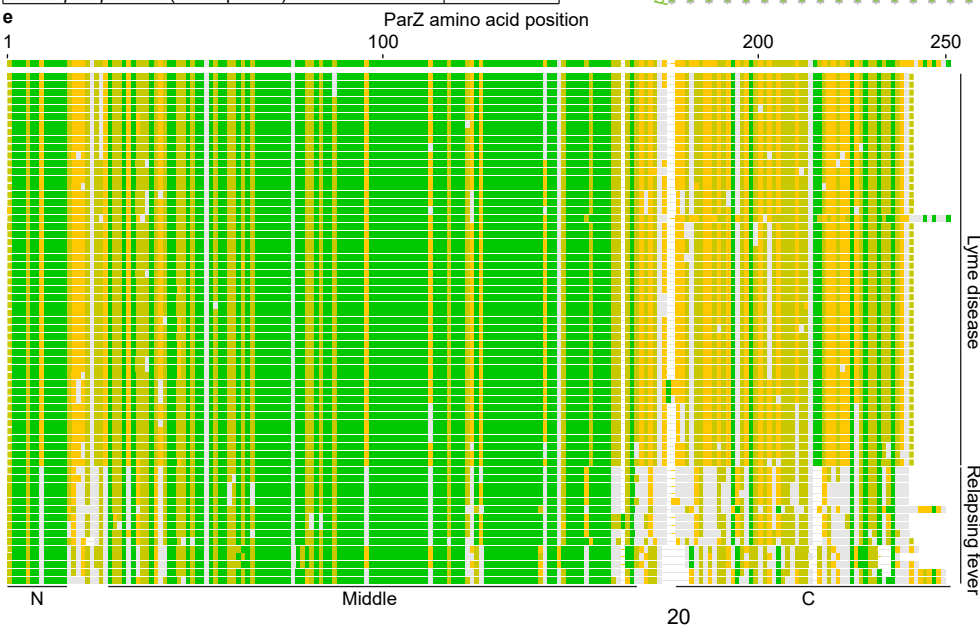

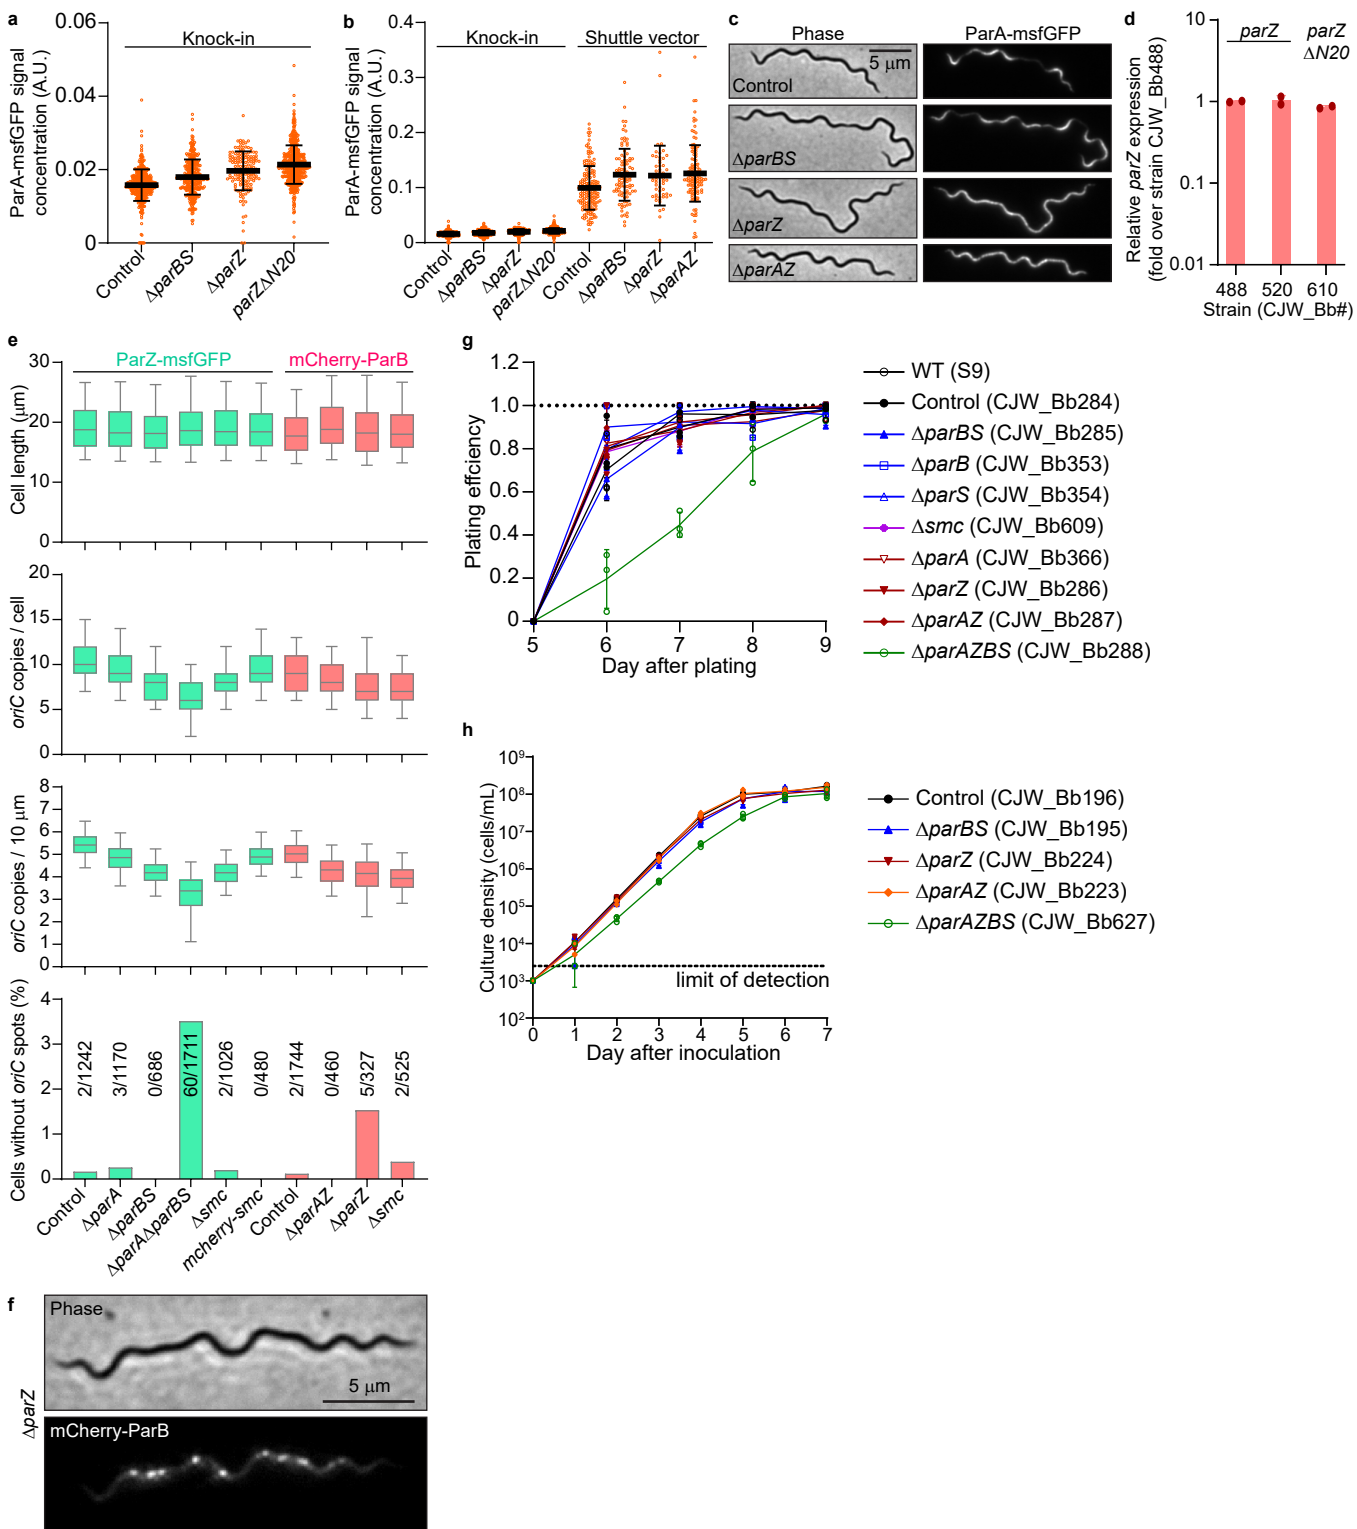

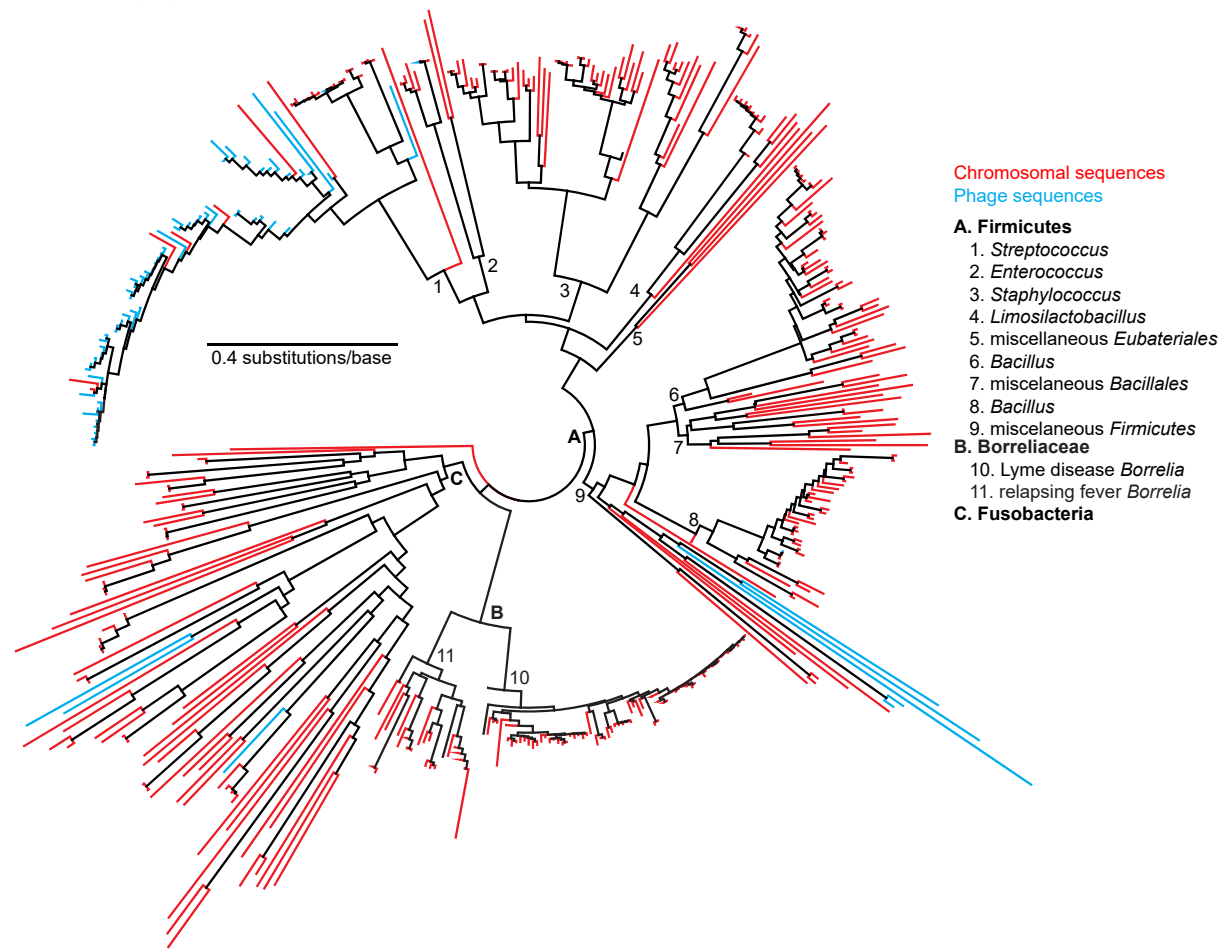

a

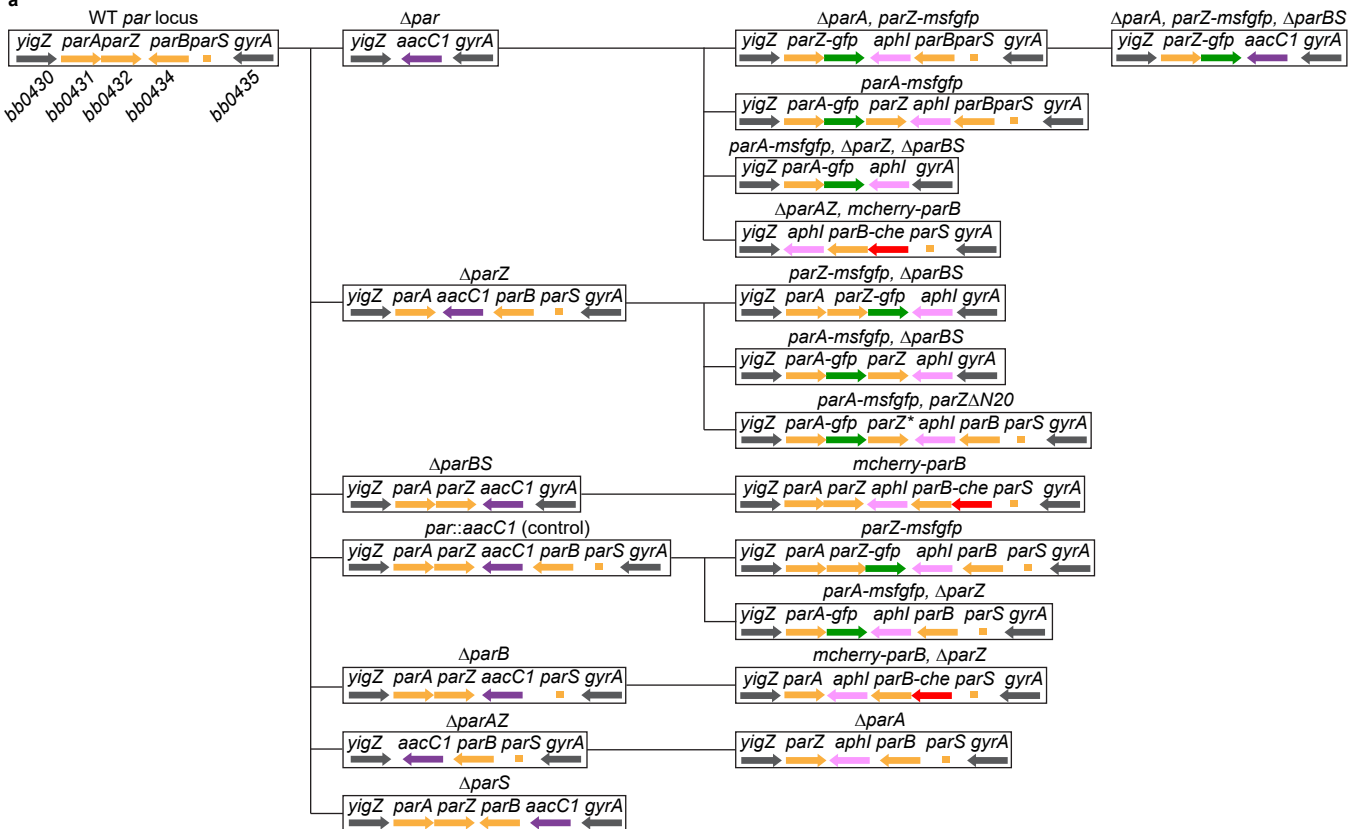

b

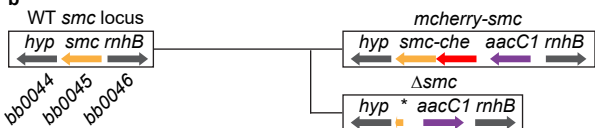

311 SUPPLEMENTARY REFERENCES

- 312 1 Rodionov, O., Lobočka, M. & Yarmolinsky, M. Silencing of genes flanking the P1 plasmid  
 313 centromere. *Science* **283**, 546-549 (1999).
- 314 2 Dabrazhynetskaya, A., Sergueev, K. & Austin, S. Species and incompatibility determination  
 315 within the P1par family of plasmid partition elements. *J. Bacteriol.* **187**, 5977-5983 (2005).
- 316 3 Livny, J., Yamaichi, Y. & Waldor, M. K. Distribution of centromere-like *parS* sites in  
 317 bacteria: insights from comparative genomics. *J. Bacteriol.* **189**, 8693-8703 (2007).
- 318 4 Li, Y. & Austin, S. The P1 plasmid is segregated to daughter cells by a 'capture and ejection'  
 319 mechanism coordinated with *Escherichia coli* cell division. *Mol. Microbiol.* **46**, 63-74  
 320 (2002).
- 321 5 Takacs, C. N., Kloos, Z. A., Scott, M., Rosa, P. A. & Jacobs-Wagner, C. Fluorescent  
 322 proteins, promoters, and selectable markers for applications in the Lyme disease spirochete  
 323 *Borrelia burgdorferi*. *Appl. Environ. Microbiol.* **84**, e01824-18 (2018).
- 324 6 Rego, R. O., Bestor, A. & Rosa, P. A. Defining the plasmid-borne restriction-modification  
 325 systems of the Lyme disease spirochete *Borrelia burgdorferi*. *J. Bacteriol.* **193**, 1161-1171  
 326 (2011).
- 327 7 Hayes, B. M. *et al.* Regulatory protein BBD18 of the Lyme disease spirochete: essential role  
 328 during tick acquisition? *mBio* **5**, e01017-14 (2014).
- 329 8 Purser, J. E. & Norris, S. J. Correlation between plasmid content and infectivity in *Borrelia*  
 330 *burgdorferi*. *Proc. Natl. Acad. Sci. USA.* **97**, 13865-13870 (2000).
- 331 9 Jacobs, M. B., Norris, S. J., Phillippi-Falkenstein, K. M. & Philipp, M. T. Infectivity of the  
 332 highly transformable BBE02- lp56- mutant of *Borrelia burgdorferi*, the Lyme disease  
 333 spirochete, via ticks. *Infect. Immun.* **74**, 3678-3681 (2006).
- 334 10 Kawabata, H., Norris, S. J. & Watanabe, H. BBE02 disruption mutants of *Borrelia*  
 335 *burgdorferi* B31 have a highly transformable, infectious phenotype. *Infect. Immun.* **72**, 7147-  
 336 7154 (2004).
- 337 11 Jewett, M. W. *et al.* Genetic basis for retention of a critical virulence plasmid of *Borrelia*  
 338 *burgdorferi*. *Mol. Microbiol.* **66**, 975-990 (2007).
- 339 12 Sadziene, A., Wilske, B., Ferdows, M. S. & Barbour, A. G. The cryptic *ospC* gene of  
 340 *Borrelia burgdorferi* B31 is located on a circular plasmid. *Infect. Immun.* **61**, 2192-2195  
 341 (1993).
- 342 13 Casjens, S., van Vugt, R., Tilly, K., Rosa, P. A. & Stevenson, B. Homology throughout the  
 343 multiple 32-kilobase circular plasmids present in Lyme disease spirochetes. *J. Bacteriol.* **179**,  
 344 217-227 (1997).
- 345 14 Iyer, R. *et al.* Stage-specific global alterations in the transcriptomes of Lyme disease  
 346 spirochetes during tick feeding and following mammalian host adaptation. *Mol. Microbiol.*  
 347 **95**, 509-538 (2015).
- 348 15 Dunham-Ems, S. M. *et al.* Live imaging reveals a biphasic mode of dissemination of  
 349 *Borrelia burgdorferi* within ticks. *J. Clin. Invest.* **119**, 3652-3665 (2009).
- 350 16 Fazzino, L., Tilly, K., Dulebohn, D. P. & Rosa, P. A. Long-term survival of *Borrelia*  
 351 *burgdorferi* lacking the hibernation promotion factor homolog in the unfed tick vector. *Infect.*  
 352 *Immun.* **83**, 4800-4810 (2015).
- 353 17 Tilly, K., Bestor, A. & Rosa, P. A. Functional equivalence of OspA and OspB, but not OspC,  
 354 in tick colonization by *Borrelia burgdorferi*. *Infect. Immun.* **84**, 1565-1573 (2016).



- 355 18 Chu, C. Y. *et al.* Function of the *Borrelia burgdorferi* FtsH homolog is essential for viability  
356 both in vitro and in vivo and independent of HflK/C. *mBio* **7**, e00404-00416 (2016).
- 357 19 Di, L. *et al.* BorreliaBase: a phylogeny-centered browser of *Borrelia* genomes. *BMC*  
358 *Bioinformatics* **15**, 233 (2014).
- 359 20 Burgdorfer, W. *et al.* Lyme disease—a tick-borne spirochetosis? *Science* **216**, 1317-1319  
360 (1982).
- 361 21 Fraser, C. M. *et al.* Genomic sequence of a Lyme disease spirochaete, *Borrelia burgdorferi*.  
362 *Nature* **390**, 580-586 (1997).
- 363 22 Casjens, S. *et al.* A bacterial genome in flux: the twelve linear and nine circular  
364 extrachromosomal DNAs in an infectious isolate of the Lyme disease spirochete *Borrelia*  
365 *burgdorferi*. *Mol. Microbiol.* **35**, 490-516 (2000).
- 366 23 Steere, A. C. *et al.* The spirochetal etiology of Lyme disease. *N. Engl. J. Med.* **308**, 733-740  
367 (1983).
- 368 24 Schutzer, S. E. *et al.* Whole-genome sequences of thirteen isolates of *Borrelia burgdorferi*. *J.*  
369 *Bacteriol.* **193**, 1018-1020 (2011).
- 370 25 Casjens, S. R. *et al.* Genome stability of Lyme disease spirochetes: comparative genomics of  
371 *Borrelia burgdorferi* plasmids. *PLoS One* **7**, e33280 (2012).
- 372 26 Piesman, J., Mather, T. N., Sinsky, R. J. & Spielman, A. Duration of tick attachment and  
373 *Borrelia burgdorferi* transmission. *J. Clin. Microbiol.* **25**, 557-558 (1987).
- 374 27 Schwan, T. G., Burgdorfer, W., Schrupf, M. E. & Karstens, R. H. The urinary bladder, a  
375 consistent source of *Borrelia burgdorferi* in experimentally infected white-footed mice  
376 (*Peromyscus leucopus*). *J. Clin. Microbiol.* **26**, 893-895 (1988).
- 377 28 Lin, T. *et al.* Analysis of an ordered, comprehensive STM mutant library in infectious  
378 *Borrelia burgdorferi*: insights into the genes required for mouse infectivity. *PLoS One* **7**,  
379 e47532 (2012).
- 380 29 Chan, K., Alter, L., Barthold, S. W. & Parveen, N. Disruption of *bbe02* by insertion of a  
381 luciferase gene increases transformation efficiency of *Borrelia burgdorferi* and allows live  
382 imaging in Lyme disease susceptible C3H mice. *PLoS One* **10**, e0129532 (2015).
- 383 30 Chaconas, G., Stewart, P. E., Tilly, K., Bono, J. L. & Rosa, P. Telomere resolution in the  
384 Lyme disease spirochete. *EMBO J.* **20**, 3229-3237 (2001).
- 385 31 Bestor, A. *et al.* Use of the Cre-*lox* recombination system to investigate the lp54 gene  
386 requirement in the infectious cycle of *Borrelia burgdorferi*. *Infect. Immun.* **78**, 2397-2407  
387 (2010).
- 388 32 Stewart, P. E., Thalken, R., Bono, J. L. & Rosa, P. Isolation of a circular plasmid region  
389 sufficient for autonomous replication and transformation of infectious *Borrelia burgdorferi*.  
390 *Mol. Microbiol.* **39**, 714-721 (2001).
- 391 33 Grimm, D. *et al.* Experimental assessment of the roles of linear plasmids lp25 and lp28-1 of  
392 *Borrelia burgdorferi* throughout the infectious cycle. *Infect. Immun.* **72**, 5938-5946 (2004).
- 393 34 Stewart, P. E. & Rosa, P. A. Transposon mutagenesis of the Lyme disease agent *Borrelia*  
394 *burgdorferi*. *Methods Mol. Biol.* **431**, 85-95 (2008).
- 395 35 Blevins, J. S., Revel, A. T., Smith, A. H., Bachlani, G. N. & Norgard, M. V. Adaptation of a  
396 luciferase gene reporter and *lac* expression system to *Borrelia burgdorferi*. *Appl. Environ.*  
397 *Microbiol.* **73**, 1501-1513 (2007).

398
