# Supplementary material for: Polyploidy, regular patterning of genome copies, and unusual control of DNA partitioning in the Lyme disease spirochete
Source: PubMed Central journal article supplement (PMC9712426; doi:10.1038/s41467-022-34876-4), 2022-11-22
Supplement: 41467_2022_34876_MOESM3_ESM.pdf [file 41467_2022_34876_MOESM3_ESM.pdf]

## **Description of Additional Supplementary Files:**

**Supplementary Dataset 1:** Supplementary Data 1 contains information regarding the *B. burgdorferi* strains used in this study (Worksheet 1), the plasmids used in this study (Worksheet 2) and sequences of oligonucleotide primers used for plasmid generation (Worksheet 3). Worksheet-specific legends for each applicable column are provided in the first row below the column title.

**Supplementary Dataset 2:** Supplementary Data 2 contains the following information regarding the imaging experiments analyzed in this study. Worksheet 1 lists all the imaging experiments, including information on culture density, number of cells analyzed, and analysis parameters used for spot detection. Worksheet 2 lists experimental details about the cultures used for ChIP-seq experiments and WGS as well as the GEO access codes for each sample. Worksheet 3 summarized the number of replicates and the number of cells analysed in order to generate the indicated figure panels
